# Supplementary material
Source: PubMed Central journal article supplement (PMC5695840)
Supplement: en.2017-00615.sf1.pdf [file en.2017-00615.sf1.pdf]

# Supplemental Figure 1

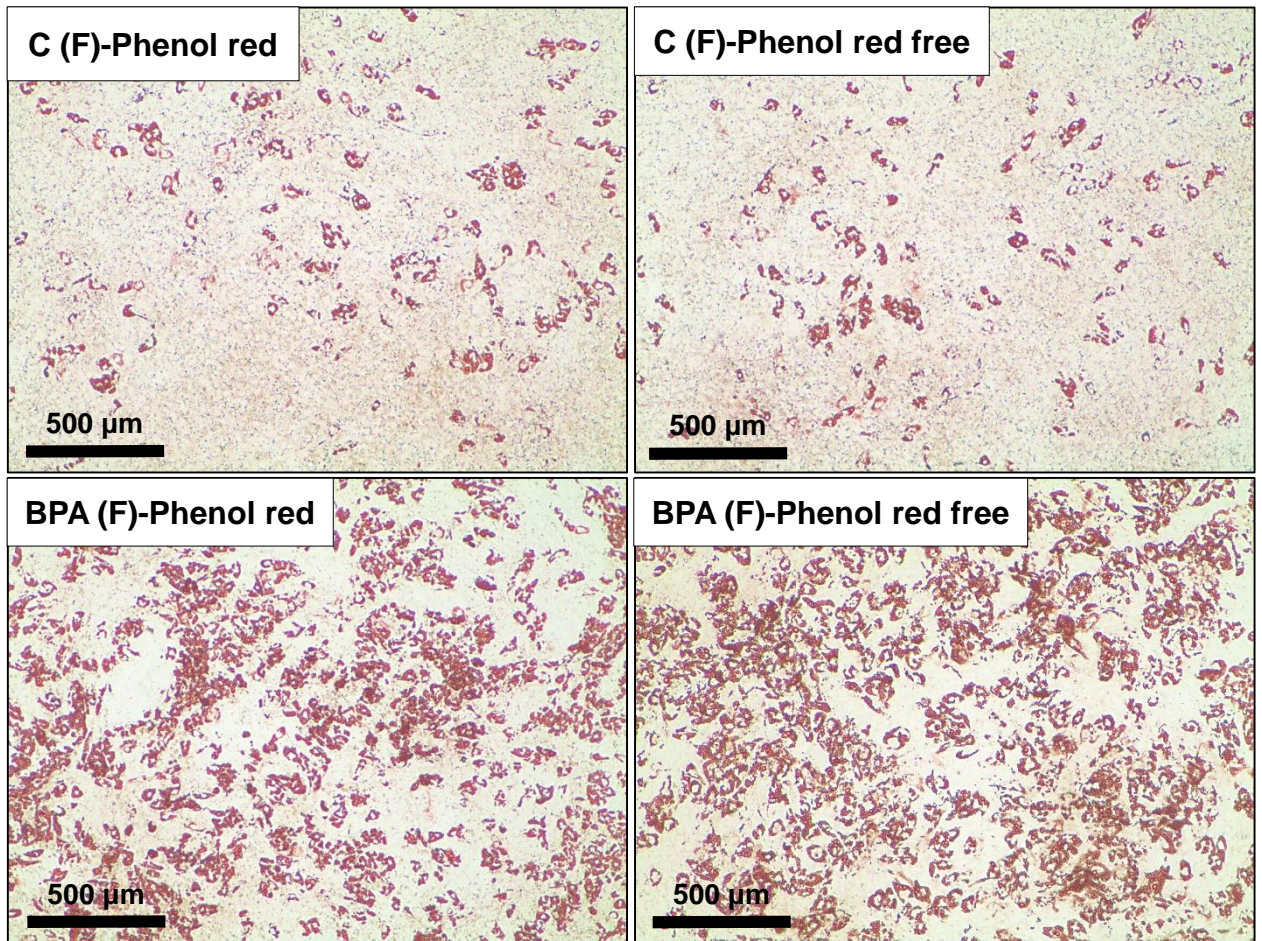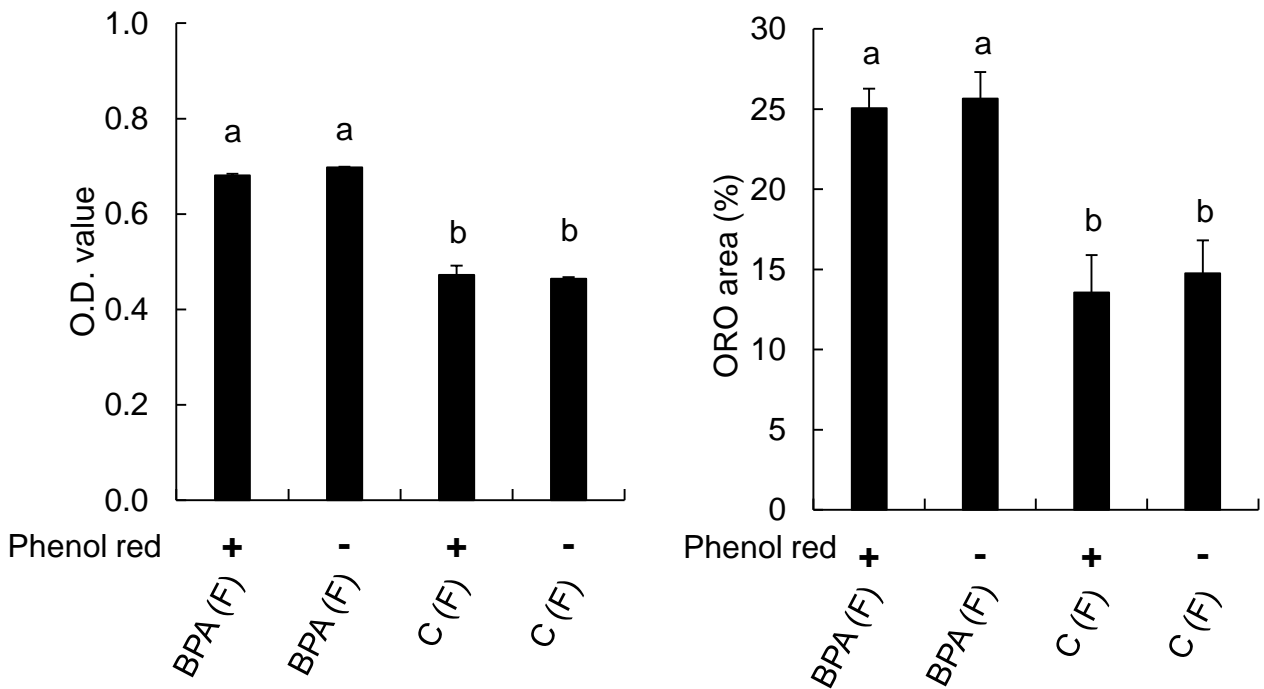

**Supplemental Figure 1.** Effects of phenol red and phenol red-free medium on preadipocyte adipogenic differentiation. Representative images of ORO-stained differentiated adipocytes from fetal female control (C (F)) and female BPA-gestationally exposed (BPA(F)) preadipocytes at differentiation day 8. Same differentiation protocol as described for Figure 3 was used. Adipocyte differentiation quantification by O.D. (*left*) value and ORO positive stain area (*right*). *a*#*b* denotes significant difference at  $P < 0.05$ .

## Supplemental Figure 2

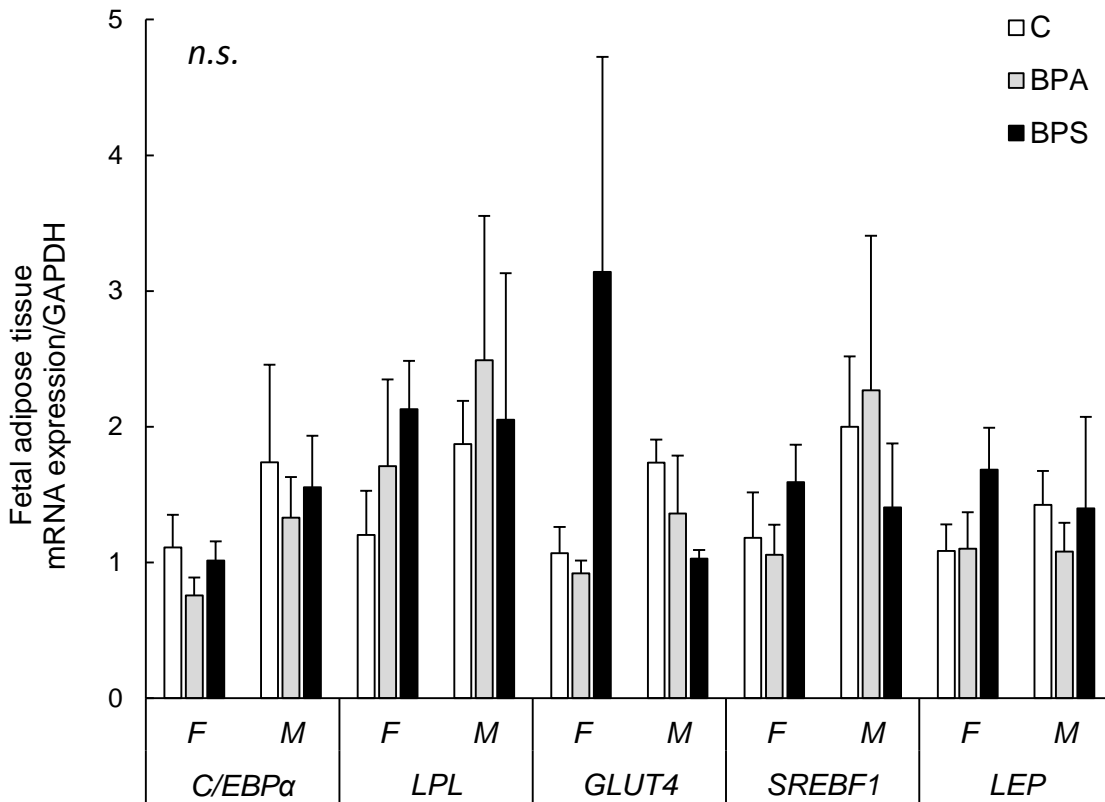

**Supplemental Figure 2.** mRNA expression (mean  $\pm$  SE) of early (*C/EBP $\alpha$* ) and late (*LPL*, *GLUT4*, *SREBF1*, *LEP*) stage adipocyte markers in control (*open*), BPA (*gray*) and BPS (*closed*) male (M) and females (F) perirenal adipose tissue. N=4-6/group/sex. n.s.: not significant.

# Supplemental Table 1

**Supplemental Table 1.** Primers for quantitative real time PCR.

| Gene                                      | Primers                 | Length (bp) | Accession      |
|-------------------------------------------|-------------------------|-------------|----------------|
| <i>ADIPOQ</i> - Forward                   | CCCATTTCGCTTTACCAA      | 151         | NM_001308565   |
| <i>ADIPOQ</i> - Reverse                   | CGTTCCTGTAGAGGCTGAC     |             |                |
| $\beta$ - <i>ACTIN</i> - Forward          | CCAACCGTGAGAAGATGACC    | 97          | NM_001009784   |
| $\beta$ - <i>ACTIN</i> - Reverse          | CCAGAGGCGTACAGGGACAG    |             |                |
| <i>CASP8</i> - Forward                    | GAGTTGCAGACATCCGACA     | 97          | XM_012142500   |
| <i>CASP8</i> - Reverse                    | GCTCCCGTGCTATGCTAAA     |             |                |
| <i>CHOP10</i> - Forward                   | GCTGAGTCATTGCCGTTCT     | 67          | XM_004006542   |
| <i>CHOP10</i> - Reverse                   | GGTCCTCATACCAGGCTTCC    |             |                |
| <i>C/EBP<math>\alpha</math></i> - Forward | CCCCGACAGGAGCAAGGT      | 114         | KF830871       |
| <i>C/EBP<math>\alpha</math></i> - Reverse | GGTTCAAAGCCCCAAGT       |             |                |
| <i>DLK1</i> - Forward                     | GGCATCGTCTTCCCTCAAC     | 89          | XM_015102053   |
| <i>DLK1</i> - Reverse                     | CGCAGCAGCAGATTCTTC      |             |                |
| <i>ESR1</i> - Forward                     | CGGAAAGACCGAAGAGGA      | 171         | XM_015097472   |
| <i>ESR1</i> - Reverse                     | AGCCGTCAGGGACAACACC     |             |                |
| <i>ESR2</i> - Forward                     | GAGGCCTCCATGATGTCC      | 68          | NM_001009737   |
| <i>ESR2</i> - Reverse                     | GCCAGTTGATCATGTGTACCAG  |             |                |
| <i>ERR<math>\alpha</math></i> - Forward   | AAGCCTTCTTCAAGAGGACC    | 111         | XM_012102098   |
| <i>ERR<math>\alpha</math></i> - Reverse   | TGAAGCGGCAGGCCTGGCAGG   |             |                |
| <i>FABP4</i> - Forward                    | GGATGATAAGCTGGTGCTGG    | 53          | NM_001114667.1 |
| <i>FABP4</i> - Reverse                    | CTCTGGTAGCAGTGACACCG    |             |                |
| <i>GAPDH</i> - Forward                    | TTCCACGGCACAGTCAA       | 241         | NM_001190390   |
| <i>GAPDH</i> - Reverse                    | TCACGCCCATCACAAAC       |             |                |
| <i>GLUT4</i> - Forward                    | TGTGGCGGATGCTATGG       | 132         | AY949177       |
| <i>GLUT4</i> - Reverse                    | CGGAAGACGGCTGAGAT       |             |                |
| <i>GR</i> - Forward                       | CTCCAGTCAGAACTGGCAGC    | 70          | NM_001114186   |
| <i>GR</i> - Reverse                       | TTCAACCACATCATGCATGG    |             |                |
| <i>HSPA5</i> - Forward                    | GCTGGAECTATTGCTGGATT    | 276         | XM_004005637   |
| <i>HSPA5</i> - Reverse                    | AACATCTTTGCCAGTCTTCTTT  |             |                |
| <i>IRE1<math>\alpha</math></i> - Forward  | CAACCACTCGTCCACTCC      | 80          | XM_015098372   |
| <i>IRE1<math>\alpha</math></i> - Reverse  | CCTCATCCTCGTCTGCTCTG    |             |                |
| <i>LPL</i> - Forward                      | CTGCCTGAAGTTTCCACAA     | 173         | NM_001009394   |
| <i>LPL</i> - Reverse                      | TCTCCTGCCTTTACTCTGATC   |             |                |
| <i>LEP</i> - Forward                      | CGCAAGGTCCAGGATGACAC    | 124         | XM_004008038   |
| <i>LEP</i> - Reverse                      | GCCAGGGATGAAGTCCAAAC    |             |                |
| <i>MAPK</i> - Forward                     | GCAGAAGCAAGCGTGAC       | 106         | XM_012105508   |
| <i>MAPK</i> - Reverse                     | TGGGTCCTGAACCTAT        |             |                |
| <i>PERK</i> - Forward                     | CAAACGGAGCACGCAGAT      | 88          | XM_015094355   |
| <i>PERK</i> - Reverse                     | GTGTAGGAGAAGAACAGGGTC   |             |                |
| <i>PPAR<math>\gamma</math></i> - Forward  | TGGATGACCACTCCCATGCC    | 97          | NM_001100921   |
| <i>PPAR<math>\gamma</math></i> - Reverse  | TTGGGAACGGAATGTCCTC     |             |                |
| <i>RPL27</i> - Forward                    | CGCAAGGCCCGACGAGAGGC    | 93          | XM_015098799   |
| <i>RPL27</i> - Reverse                    | GACCTAAAACCGCAGCTTCTGG  |             |                |
| <i>SOX6</i> - Forward                     | AGGATGCTGACTGGGACA      | 103         | XM_015100742   |
| <i>SOX6</i> - Reverse                     | GGTGAGGTAGAGGTATTTTCG   |             |                |
| <i>SREBF1</i> - Forward                   | TACATCCGCTTCTTCAGCACAG  | 164         | XM_015098336   |
| <i>SREBF1</i> - Reverse                   | TCCACCACCTCGGGCTTCAT    |             |                |
| <i>WNT10B</i> - Forward                   | CAGTGGGAACAGCCTTGCG     | 69          | XM_012174356   |
| <i>WNT10B</i> - Reverse                   | CGGAGTTGCGGTTGTGAGC     |             |                |
| <i>XBP1-s</i> - Forward                   | GCCTTGATGTTGAGAACCAGGAG | 145         | XM_004017459   |
| <i>XBP1-s</i> - Reverse                   | CCTGCACCTGCTGCGGACTC    |             |                |
| <i>ZFP423</i> - Forward                   | CCCGATTCCAGCAACCACA     | 160         | XM_015100428   |
| <i>ZFP423</i> - Reverse                   | CGTCATCCCGCATCTTCTTCT   |             |                |

Note: Accession number from NCBI gene database.
